# Supplementary figures and images for: Comparative single-cell RNA-sequencing profiling of BMP4-treated primary glioma cultures reveals therapeutic markers
Source: PubMed Central journal article supplement — Neuro Oncol. 2022 May 26;24(12):2133–45. doi: 10.1093/neuonc/noac143 (PMC9713526; doi:10.1093/neuonc/noac143), 2022-05-26

# Supplementary figure 1

## A

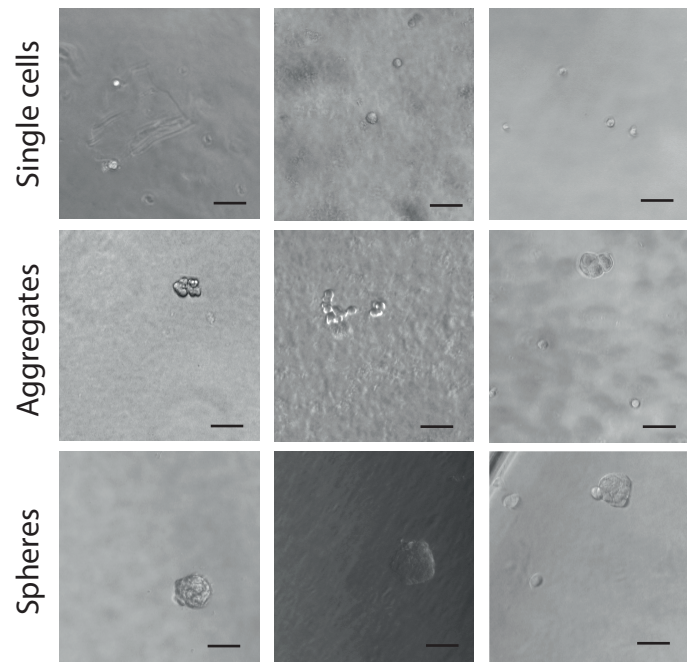

## B

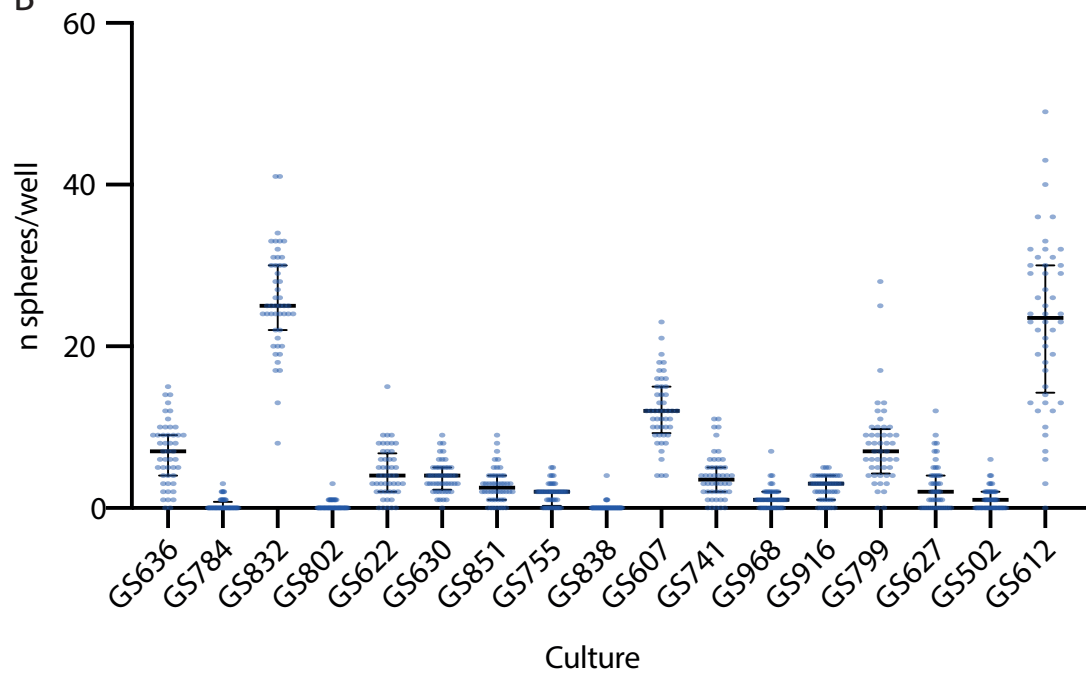

Supplement: noac143_suppl_supplementary_figure_s1.pdf [file noac143_suppl_supplementary_figure_s1.pdf]

# Supplementary Figure 10

A

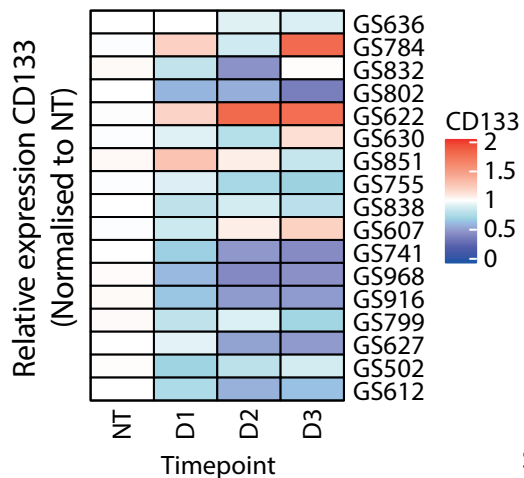

B

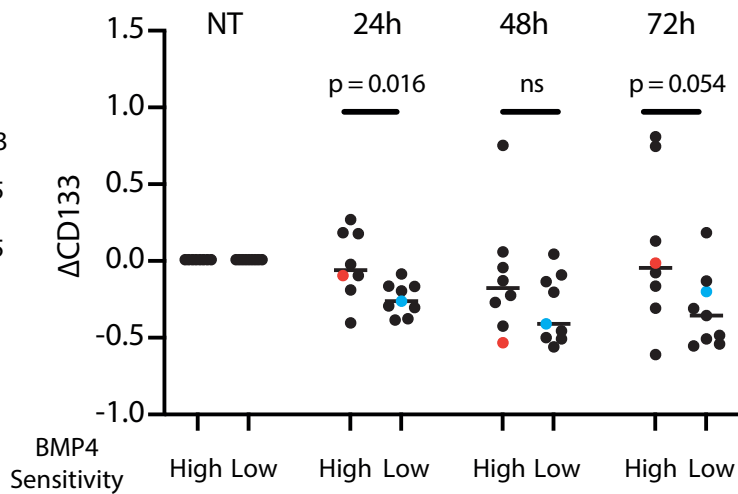

C

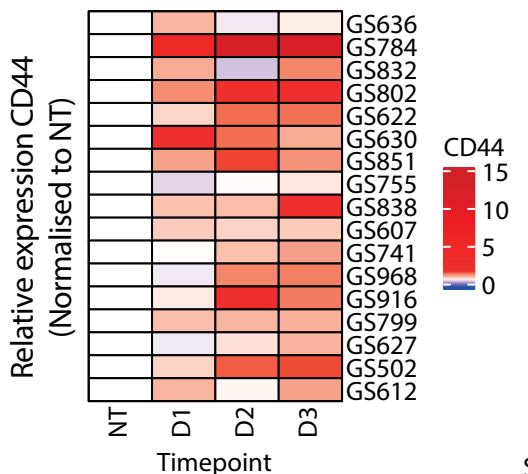

D

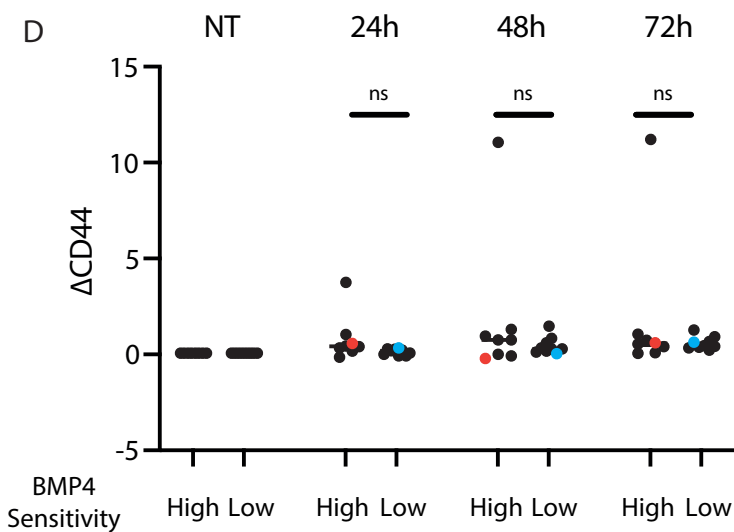

Supplement: noac143_suppl_supplementary_figure_s10.pdf [file noac143_suppl_supplementary_figure_s10.pdf]

Supplementary figure 12

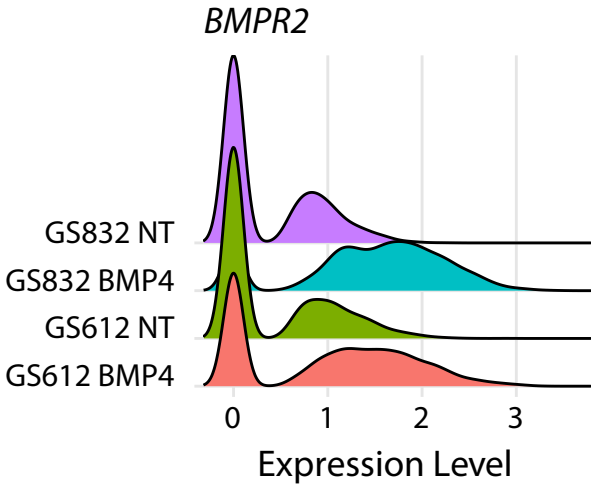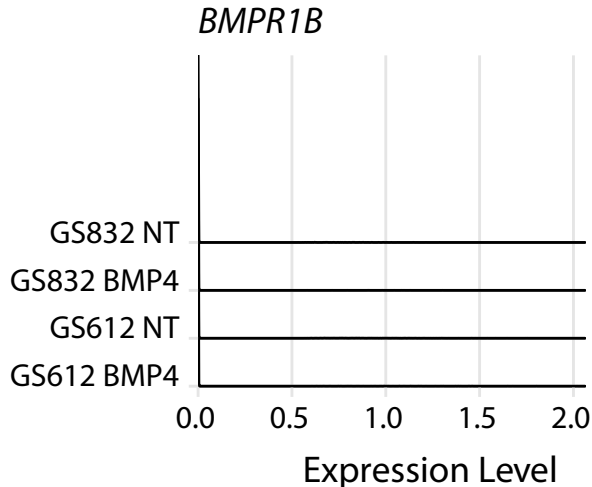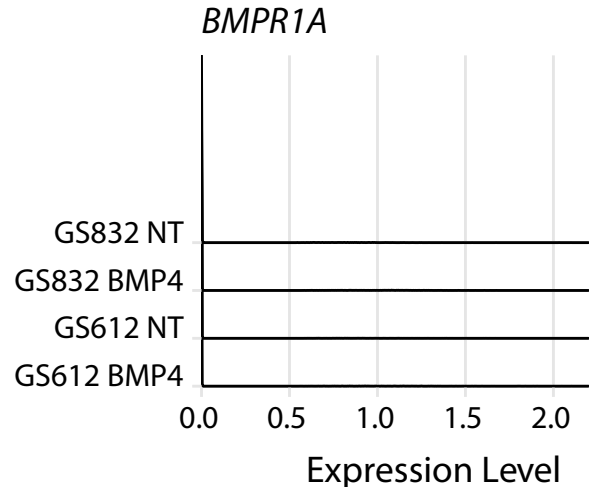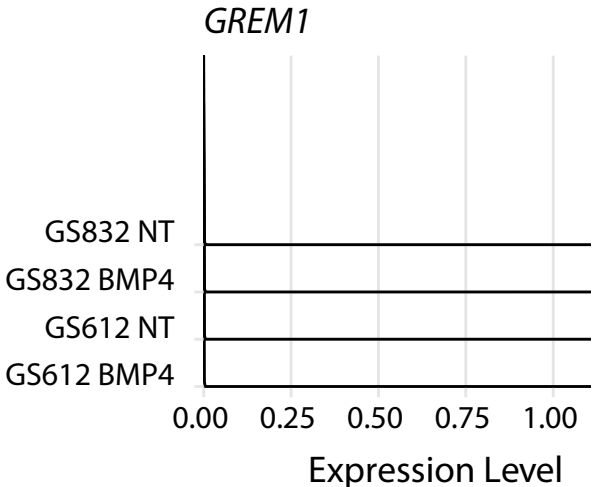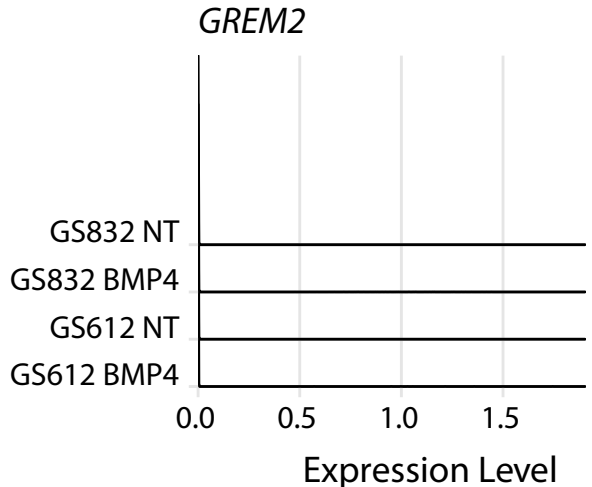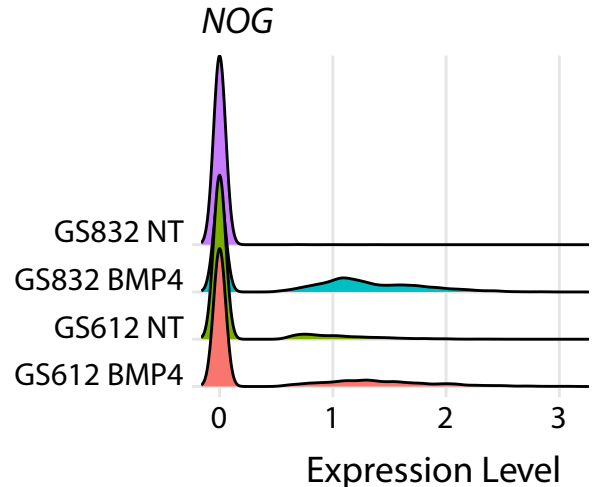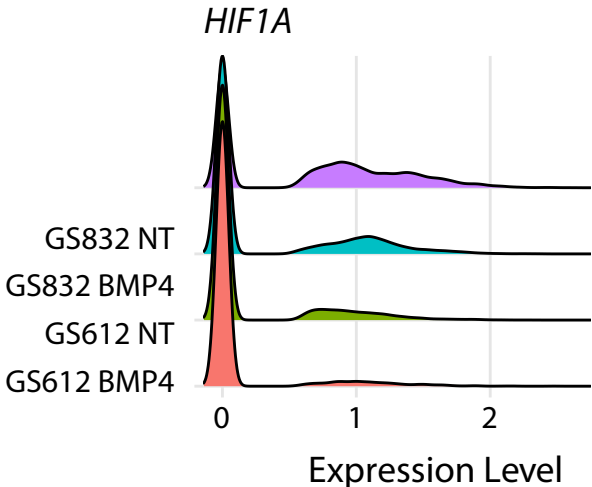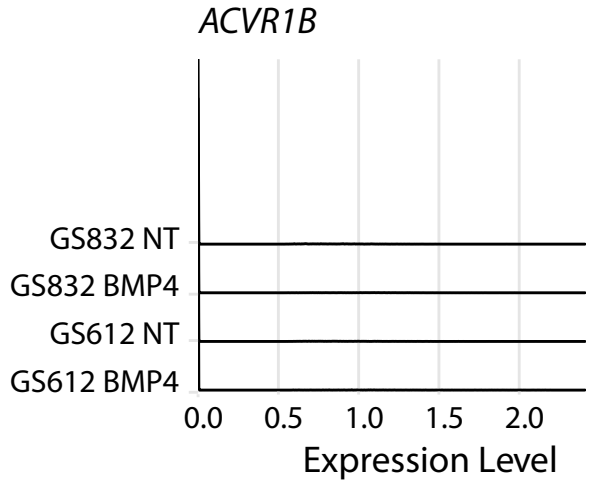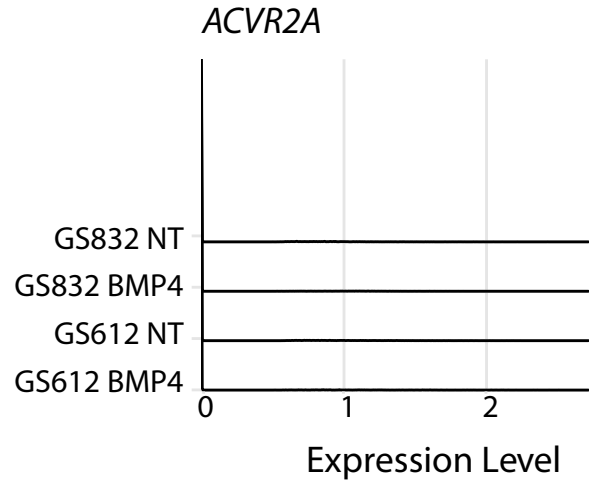

Supplement: noac143_suppl_supplementary_figure_s12.pdf [file noac143_suppl_supplementary_figure_s12.pdf]

Supplementary figure 2

A

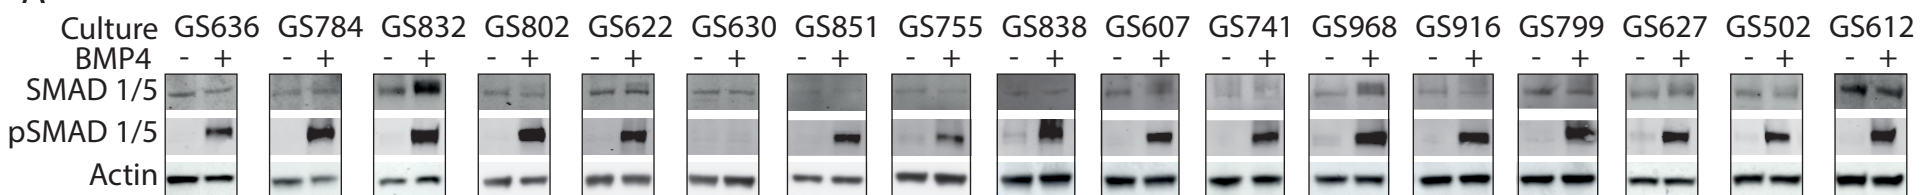

B

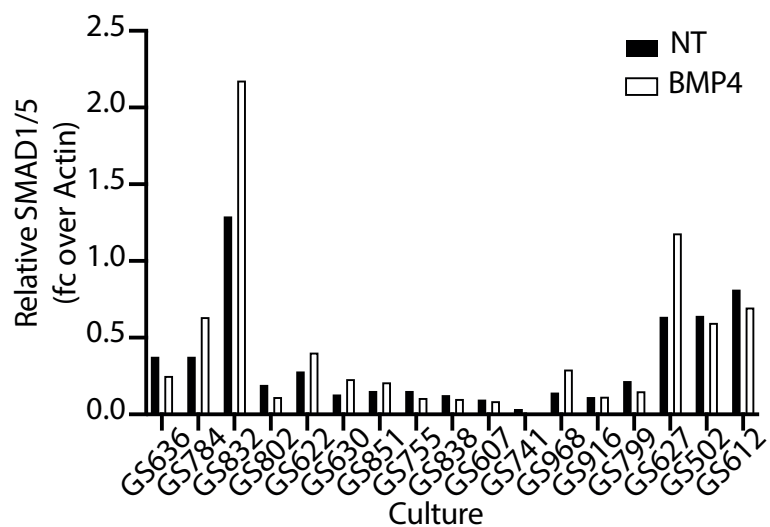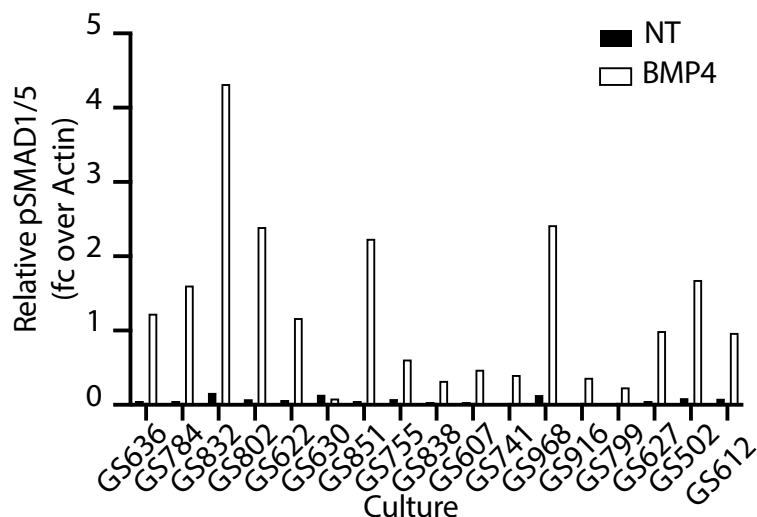

C

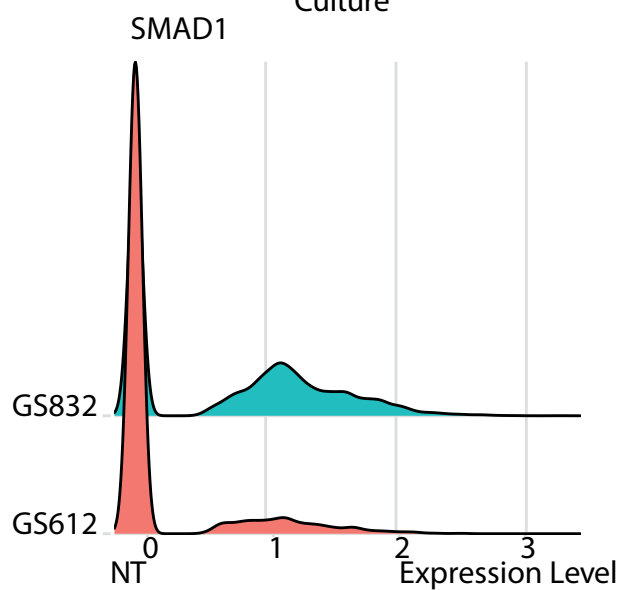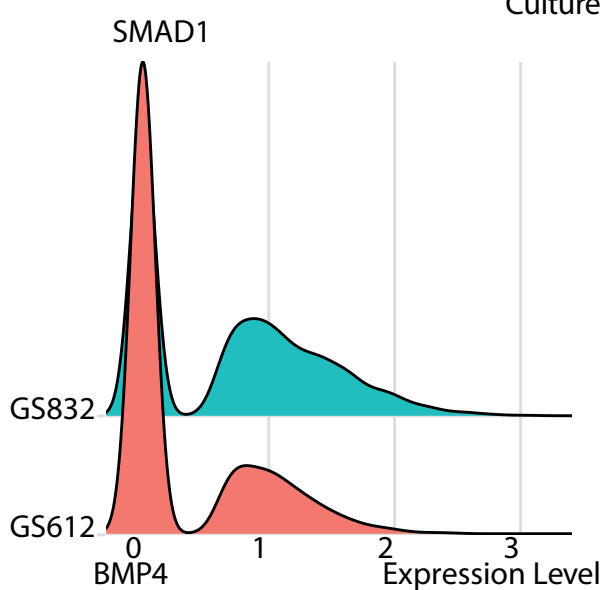

D

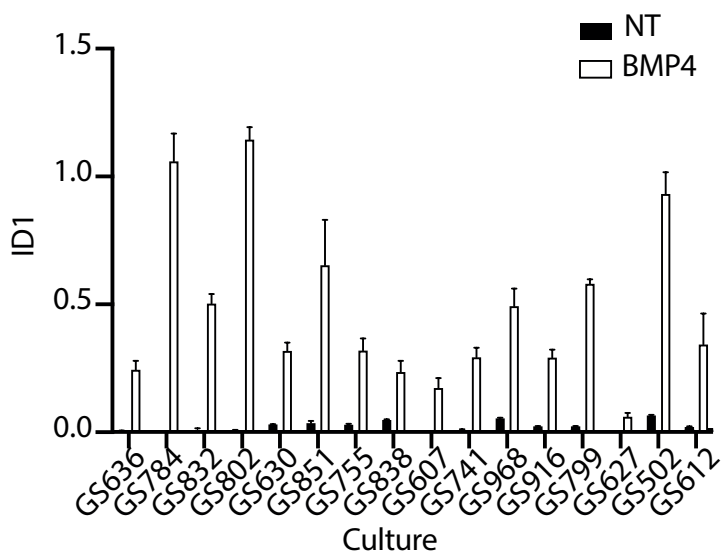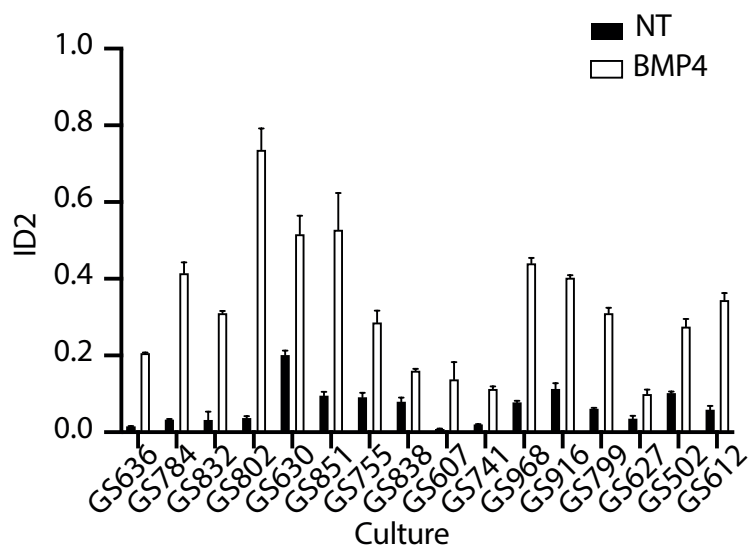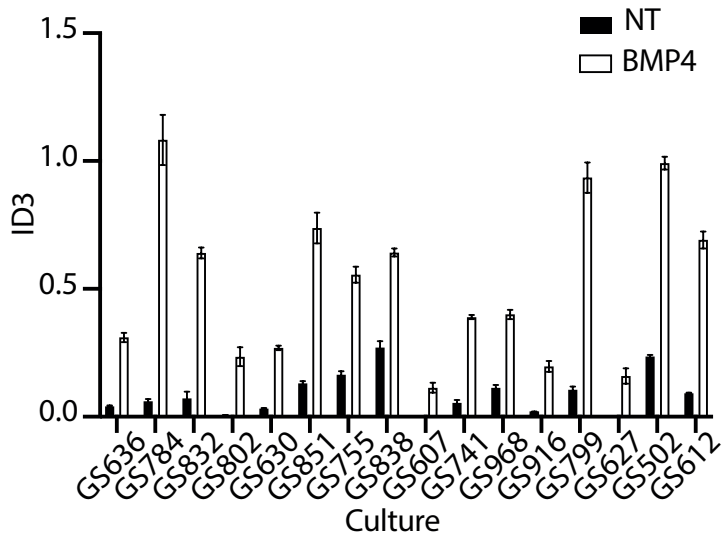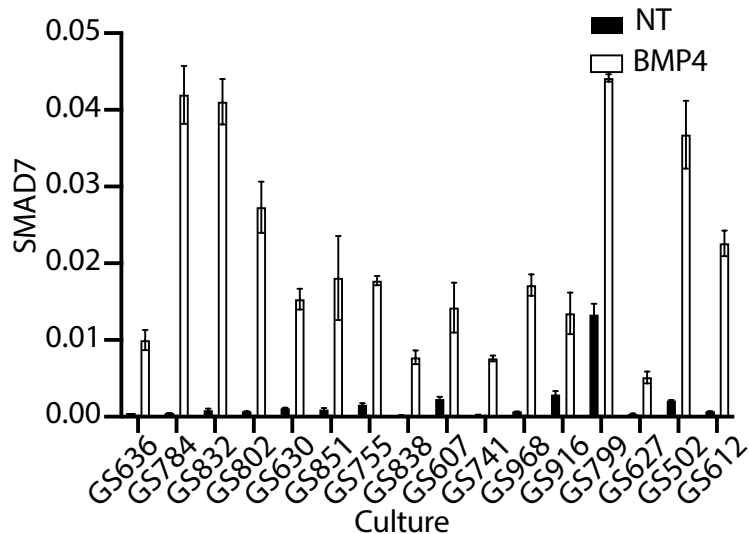

Supplement: noac143_suppl_supplementary_figure_s2.pdf [file noac143_suppl_supplementary_figure_s2.pdf]

Supplementary figure 3

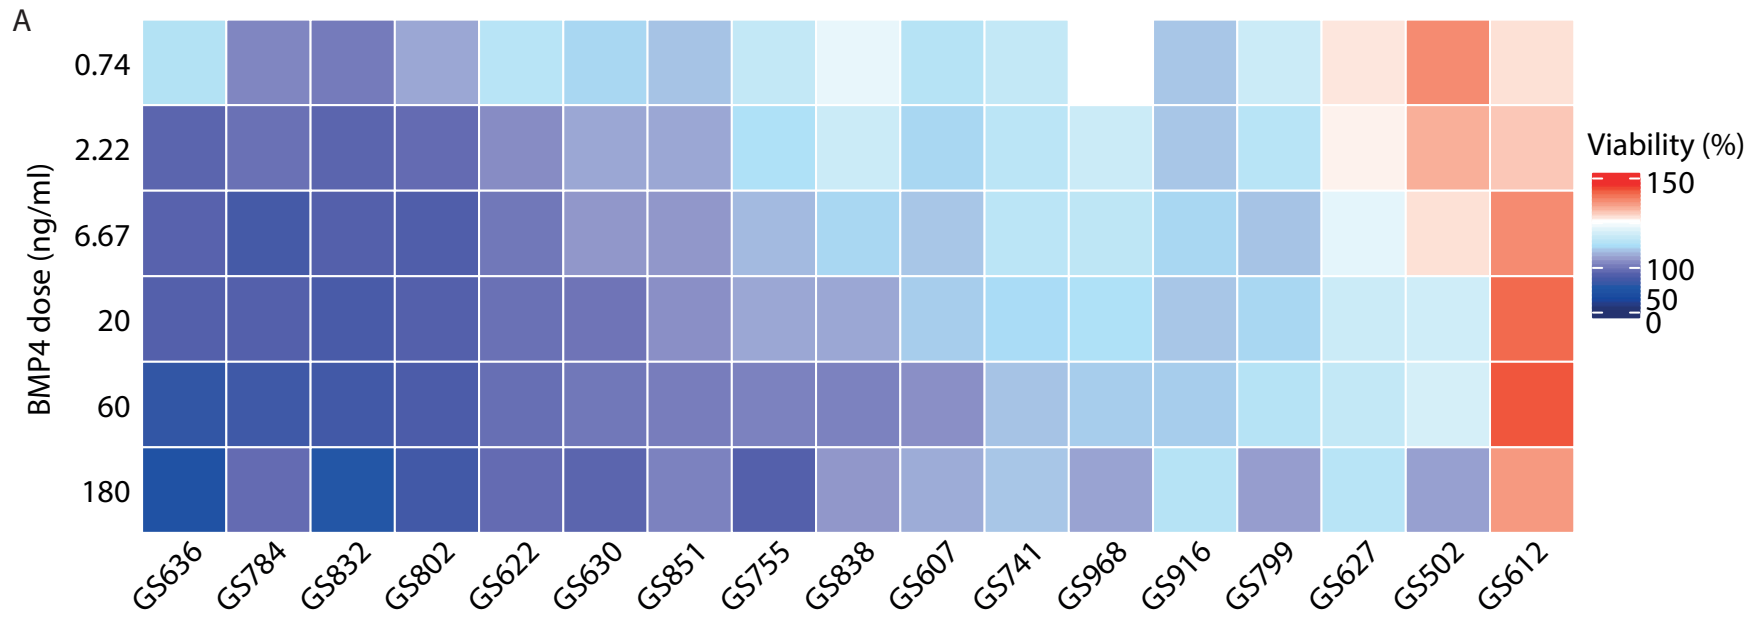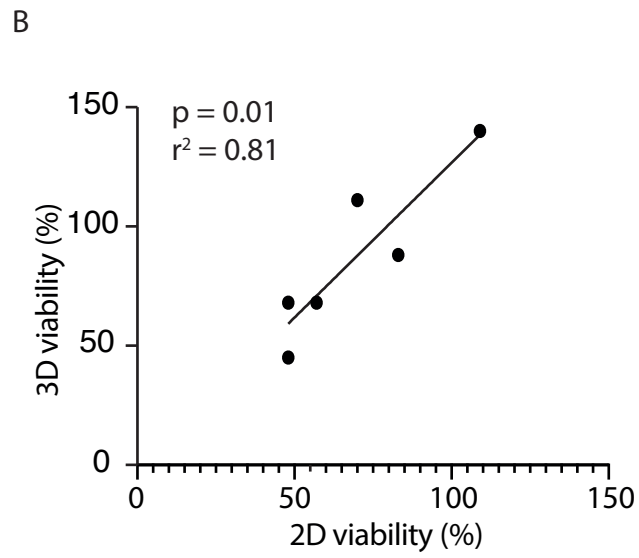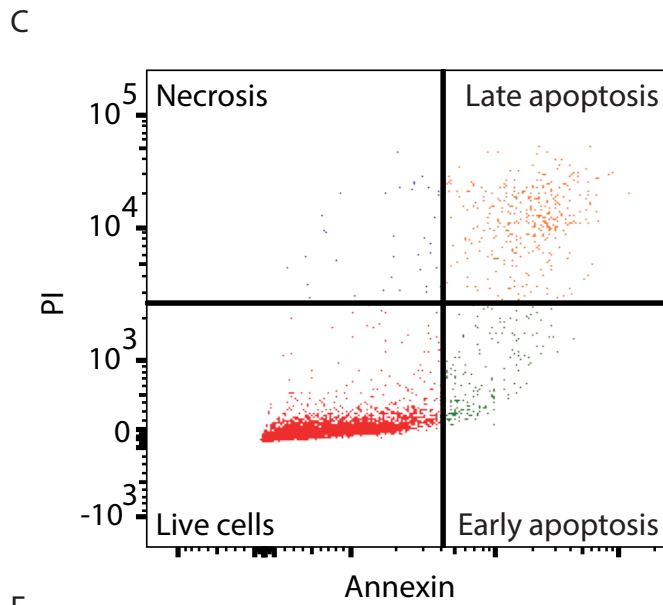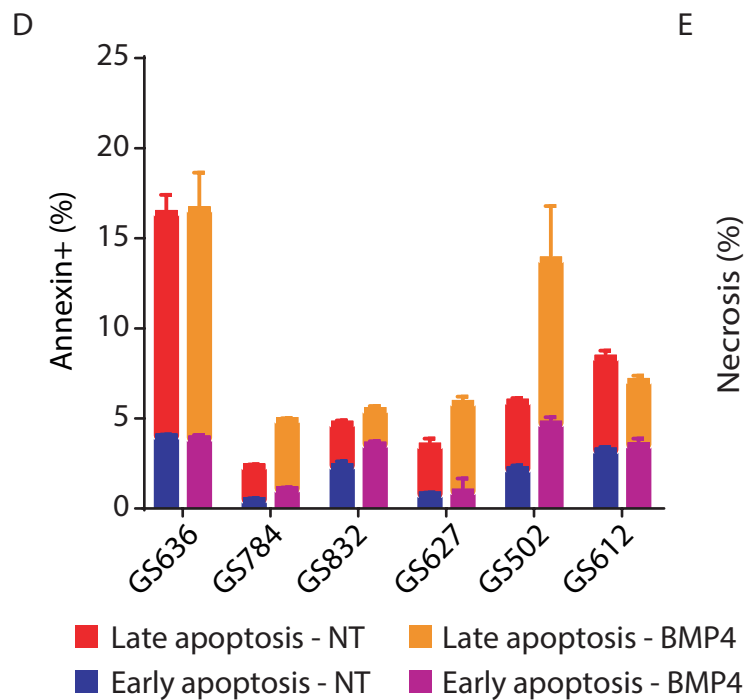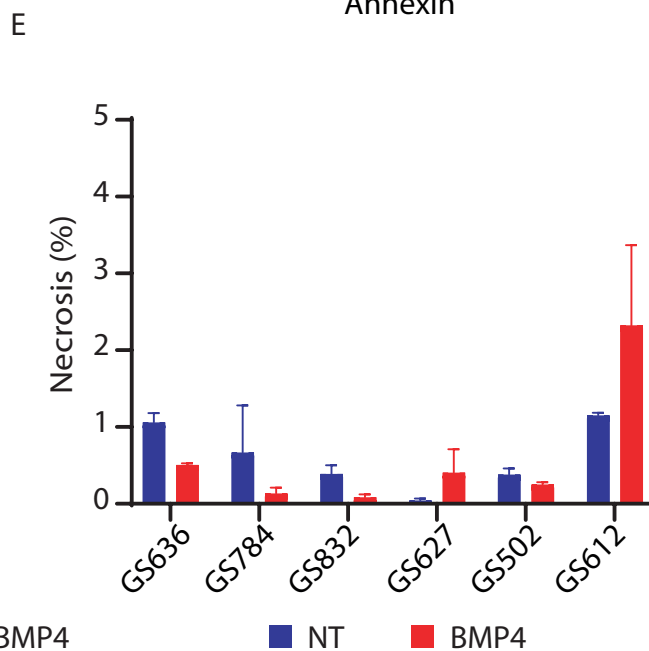

Supplement: noac143_suppl_supplementary_figure_s3.pdf [file noac143_suppl_supplementary_figure_s3.pdf]

Supplementary Figure 5

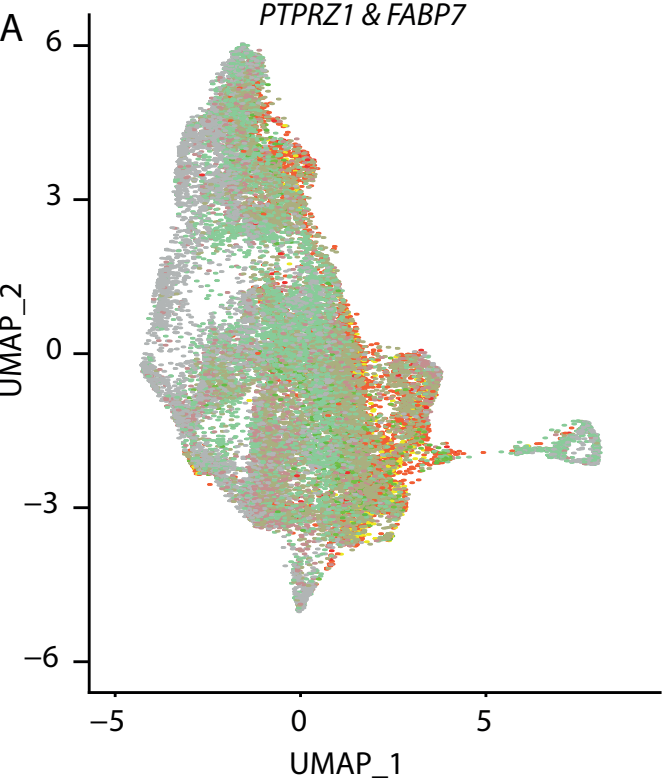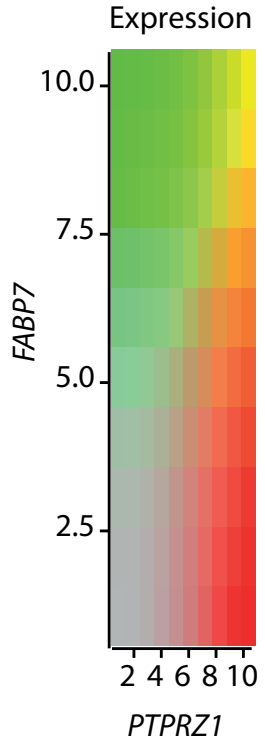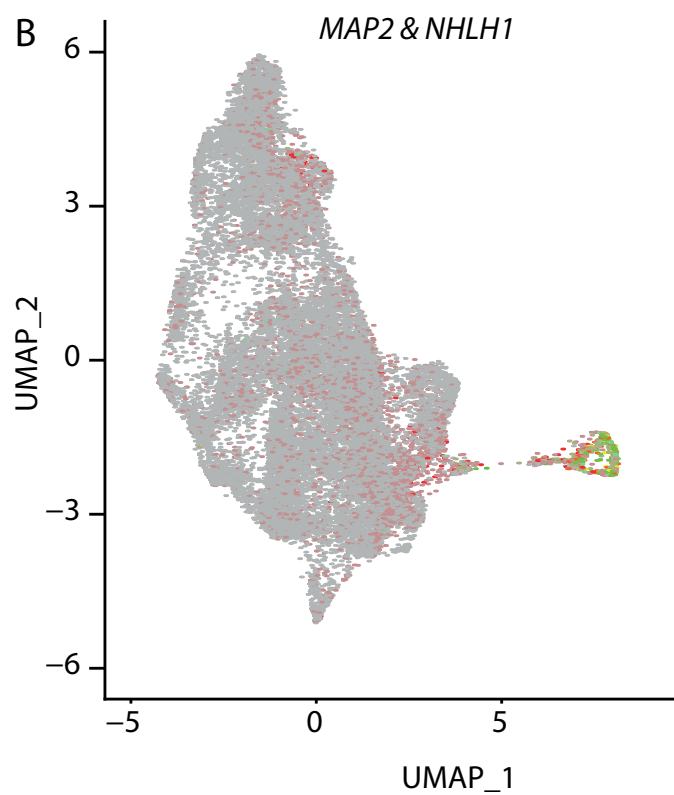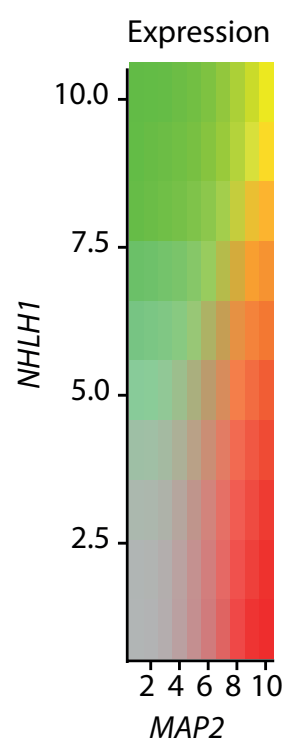

Supplement: noac143_suppl_supplementary_figure_s5.pdf [file noac143_suppl_supplementary_figure_s5.pdf]

# Supplementary Figure 6

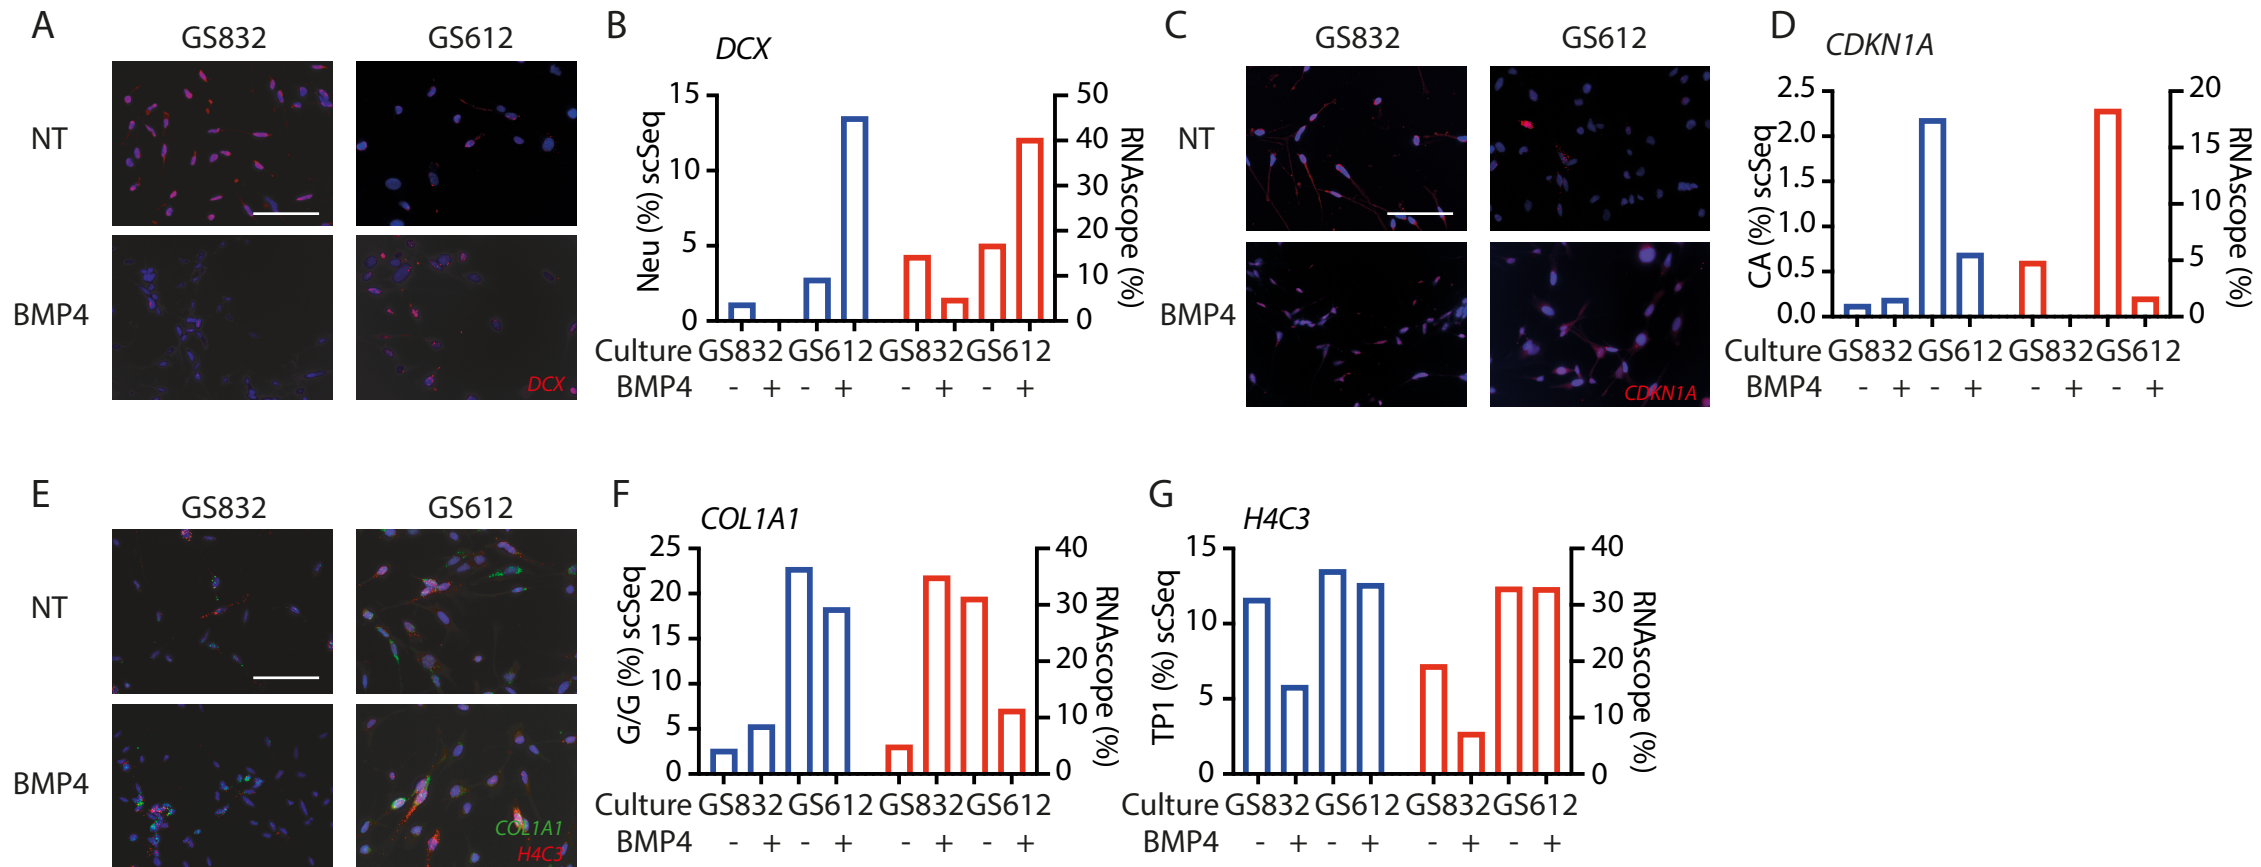

Supplement: noac143_suppl_supplementary_figure_s6.pdf [file noac143_suppl_supplementary_figure_s6.pdf]

Supplementary Figure 7

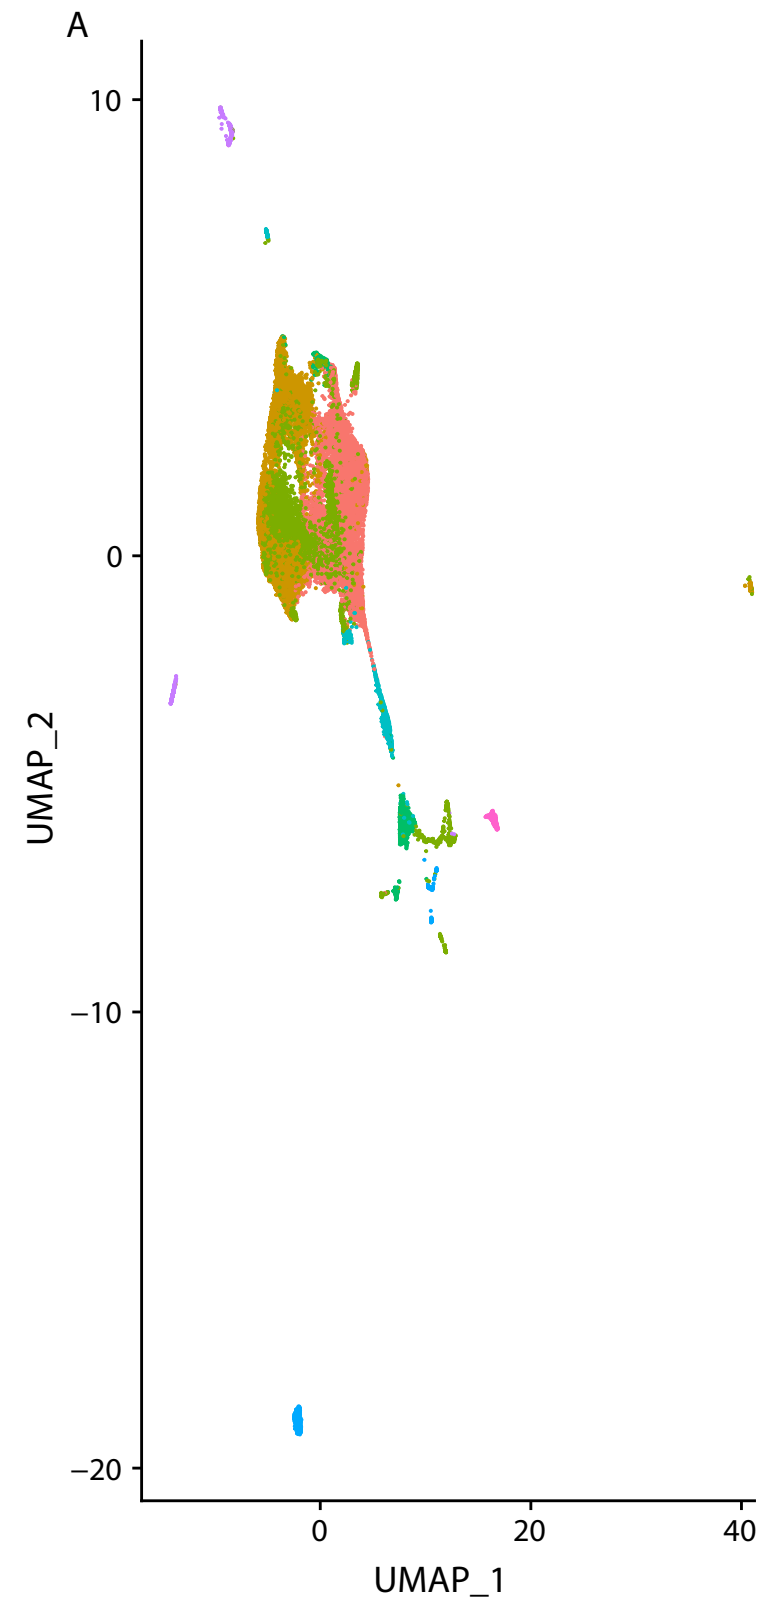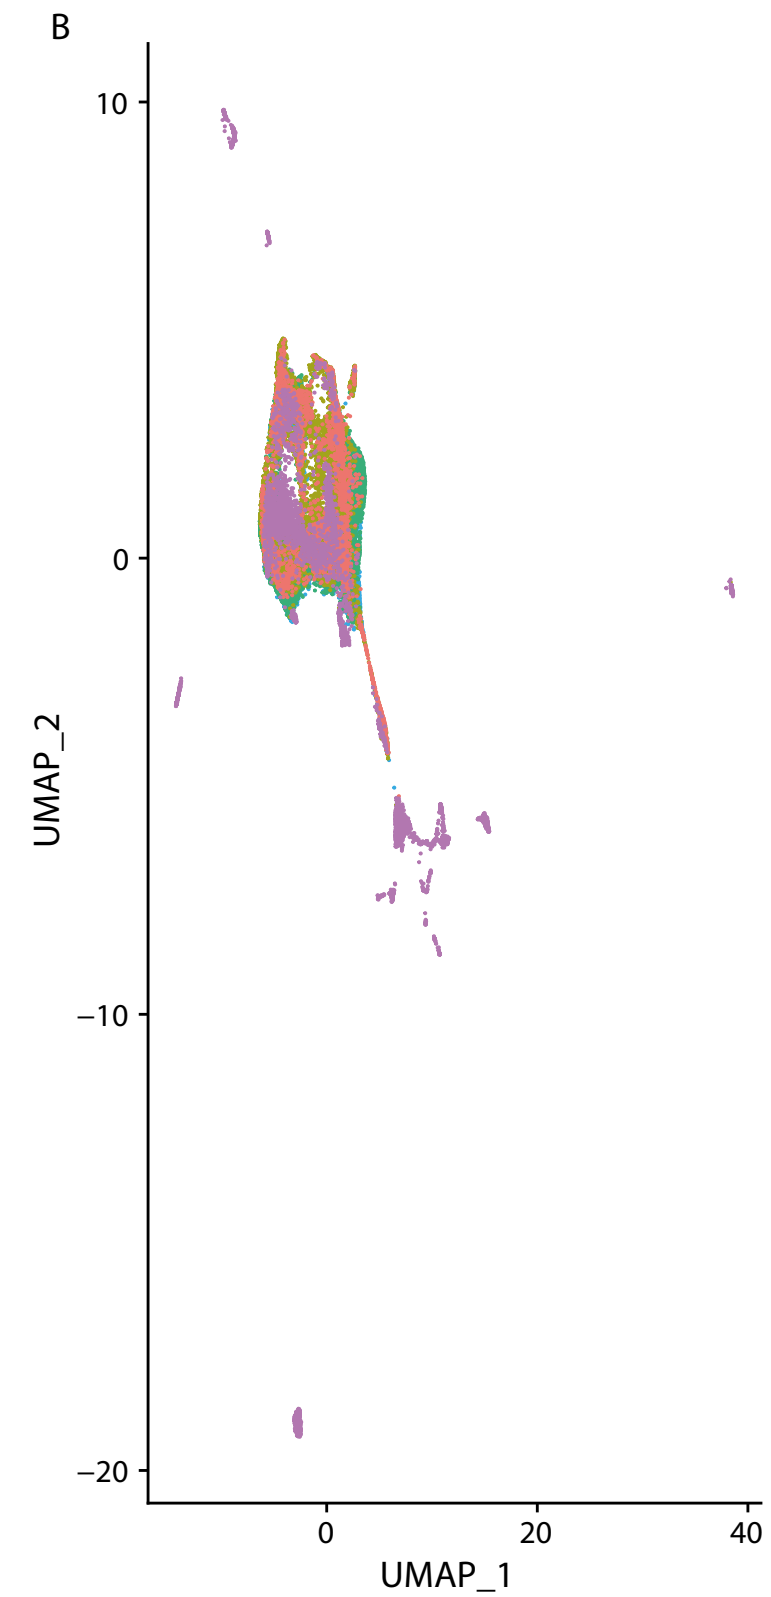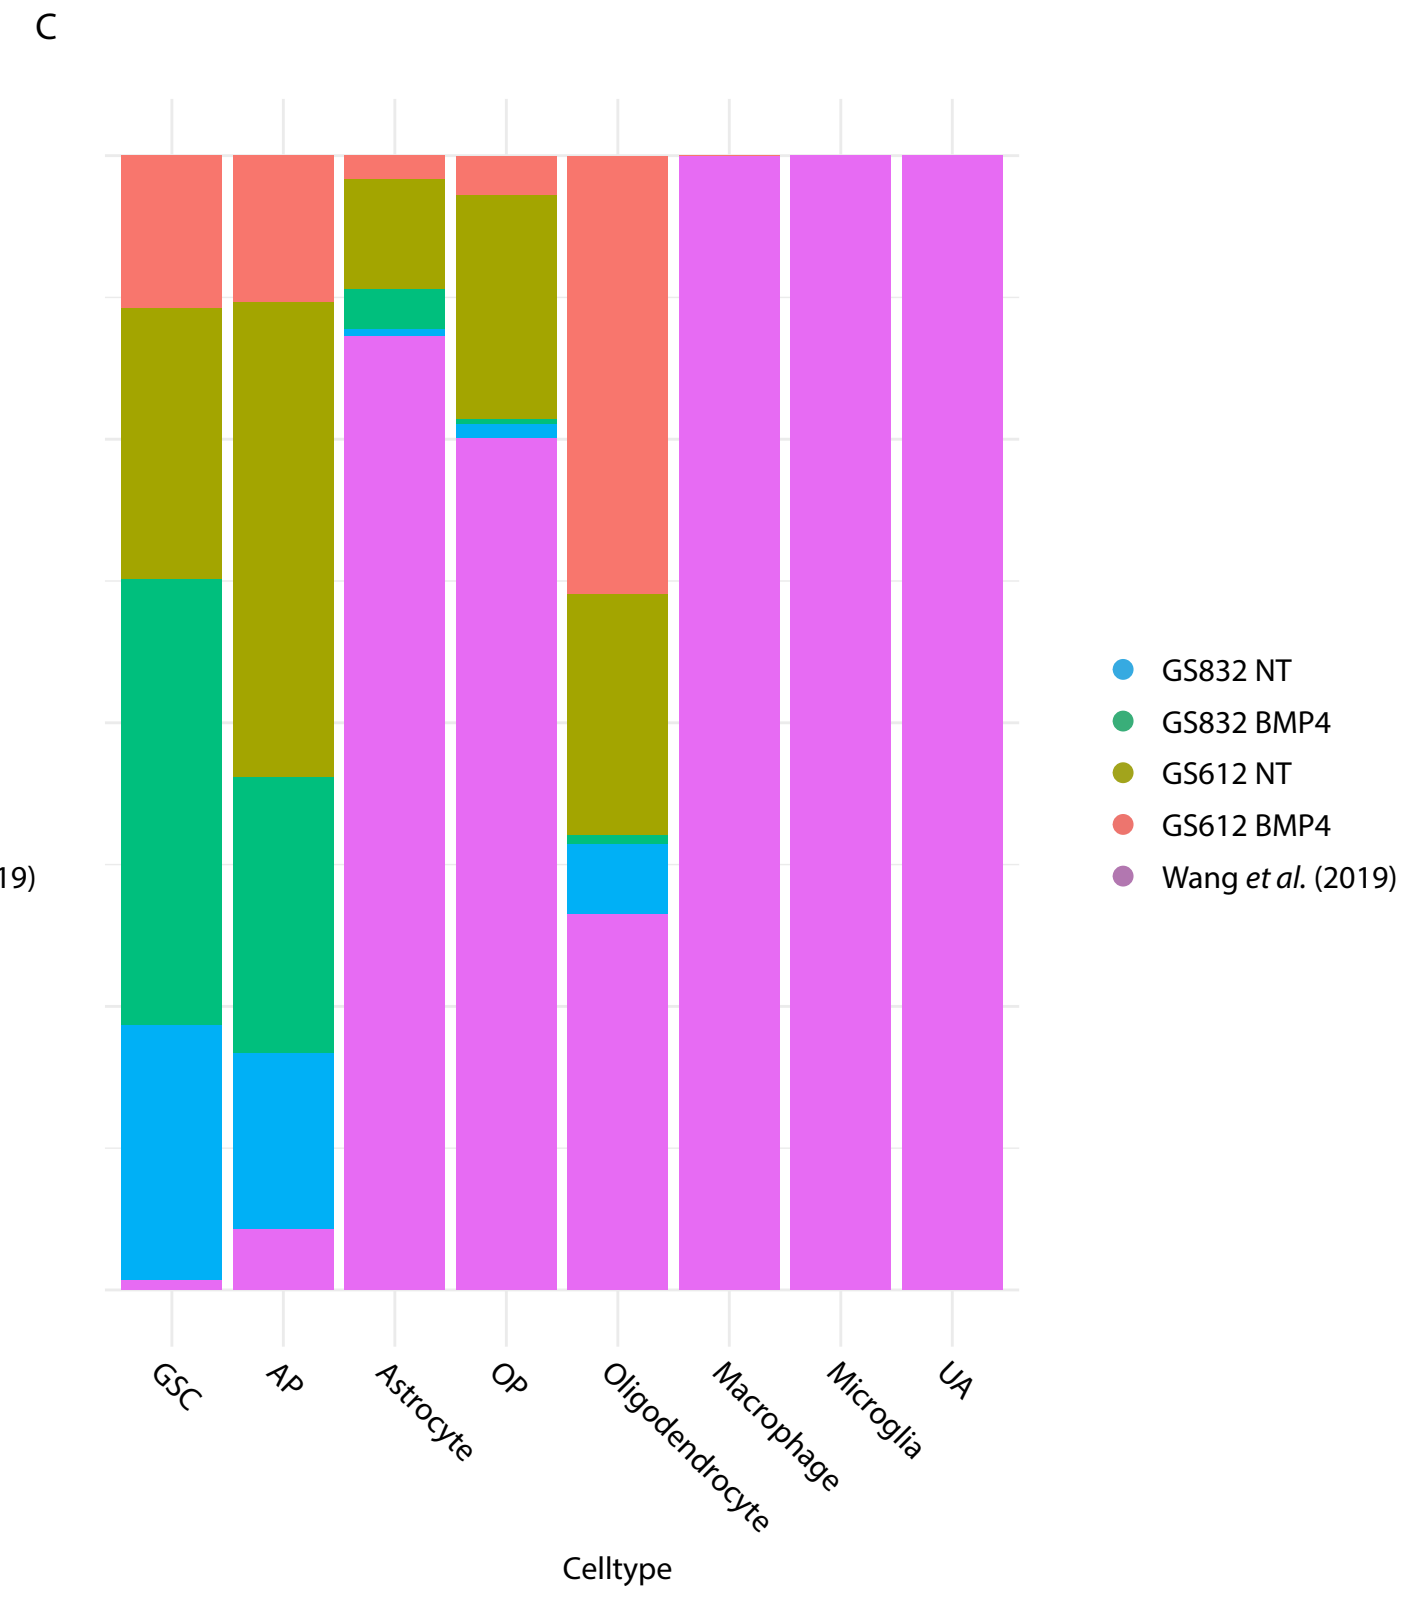

Supplement: noac143_suppl_supplementary_figure_s7.pdf [file noac143_suppl_supplementary_figure_s7.pdf]

# Supplementary Figure 8

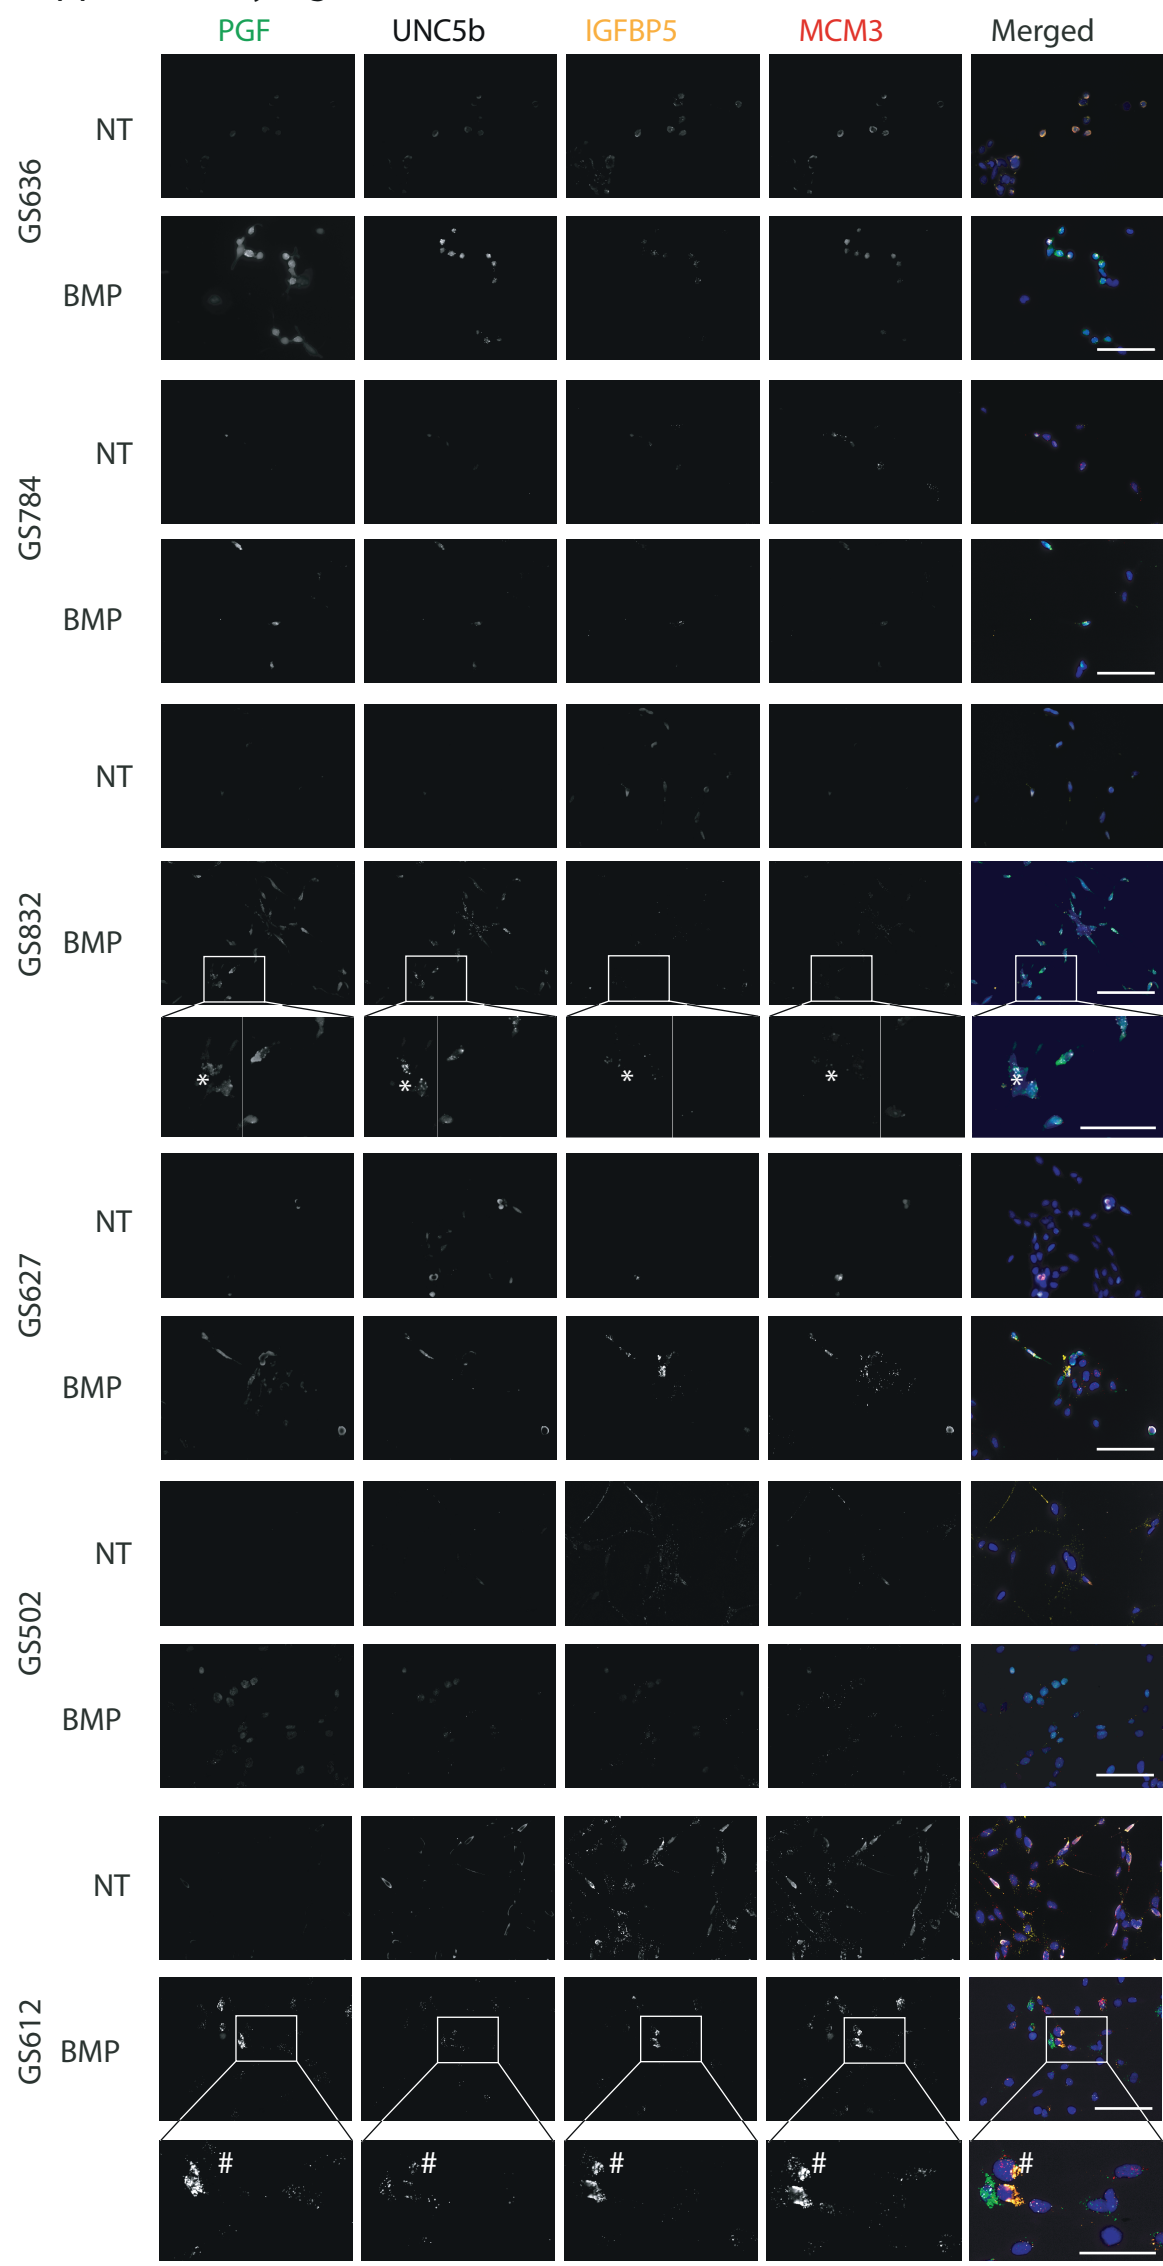

Supplement: noac143_suppl_supplementary_figure_s8.pdf [file noac143_suppl_supplementary_figure_s8.pdf]
